# Supplementary material for: Mobile phone text messaging for improving the uptake of vaccinations: a systematic review protocol
Source: PubMed Central journal article supplement — BMJ Open. 2014 Aug 4;4(8):e005130. doi: 10.1136/bmjopen-2014-005130 (PMC4127915; doi:10.1136/bmjopen-2014-005130), 2014-08-04
Supplement: bmjopen-2014-005130.draft_revisions.pdf [file bmjopen-2014-005130.draft_revisions.pdf]

# BMJ Open

## Mobile phone text messaging for improving the uptake of vaccinations: a systematic review protocol

|                                 |                                                                                                                                                                                                                                                                                                                                                       |
|---------------------------------|-------------------------------------------------------------------------------------------------------------------------------------------------------------------------------------------------------------------------------------------------------------------------------------------------------------------------------------------------------|
| Journal:                        | <i>BMJ Open</i>                                                                                                                                                                                                                                                                                                                                       |
| Manuscript ID:                  | bmjopen-2014-005130                                                                                                                                                                                                                                                                                                                                   |
| Article Type:                   | Protocol                                                                                                                                                                                                                                                                                                                                              |
| Date Submitted by the Author:   | 26-Feb-2014                                                                                                                                                                                                                                                                                                                                           |
| Complete List of Authors:       | Kalan, Robyn; University of Cape Town, Pediatric Medicine<br>Wiysonge, Charles; Stellenbosch University, Centre for Evidence-Based Health Care<br>Ramafuthole, Tshepiso; University of Cape Town, FHS<br>Allie, Kurt; University of Cape Town, FHS<br>Ebrahim, Fatima; University of Cape Town, FHS<br>Engel, Mark; University of Cape Town, Medicine |
| <b>Primary Subject Heading</b>: | Infectious diseases                                                                                                                                                                                                                                                                                                                                   |
| Secondary Subject Heading:      | Global health, Paediatrics, Public health                                                                                                                                                                                                                                                                                                             |
| Keywords:                       | Vaccine coverage, vaccination, Mobile text messaging, short messaging service, SMS                                                                                                                                                                                                                                                                    |
|                                 |                                                                                                                                                                                                                                                                                                                                                       |

SCHOLARONE™  
Manuscripts

1  
2  
3 Mobile phone text messaging for improving the uptake of vaccinations: a systematic  
4 review protocol  
5  
6  
7

8 Robyn Kalan

9  
10 Department of Medicine, Faculty of Health Sciences, University of Cape Town, Anzio  
11 Road, Observatory 7925, Cape Town, South Africa

12 Robyn.kalan@gmail.com  
13

14  
15 Charles S. Wiysonge

16  
17 Department of Interdisciplinary Health Sciences

18 Faculty of Medicine and Health Sciences

19 Stellenbosch University

20 Tygerberg 7505, Cape Town, South Africa

21 [charlesw@sun.ac.za](mailto:charlesw@sun.ac.za)  
22  
23  
24  
25  
26  
27

28 Tshepiso Ramafuthole

29  
30 Faculty of Health Sciences, University of Cape Town, Anzio Road, Observatory 7925,  
31 Cape Town, South Africa

32 rmftsh001@myuct.ac.za  
33  
34  
35  
36

37 Kurt Allie

38 Faculty of Health Sciences, University of Cape Town, Anzio Road, Observatory 7925,  
39 Cape Town, South Africa

40 allkur003@myuct.ac.za  
41  
42  
43  
44

45 Fatima Ebrahim

46 Faculty of Health Sciences, University of Cape Town, Anzio Road, Observatory 7925,  
47 Cape Town, South Africa

48 ebrfat010@myuct.ac.za  
49  
50  
51  
52

53 Mark Emmanuel Engel

54  
55 Department of Medicine, Faculty of Health Sciences, University of Cape Town, Anzio  
56 Road, Observatory 7925, Cape Town, South Africa  
57  
58  
59  
60

1  
2  
3 mark.engel@uct.ac.za  
4  
5  
6  
7

8 **\*Corresponding author**

9 Dr Mark Emmanuel Engel

10 Department of Medicine, University of Cape Town

11 J46-43, Old Main Building, Groote Schuur Hospital

12 Anzio Road, Observatory 7925, South Africa

13 Phone: +27 21 404 7676

14 Fax: 27 21 448 6815

15 E: mark.engel@uct.ac.za  
16  
17  
18  
19  
20  
21  
22  
23  
24  
25  
26  
27

28 **Keywords:** Vaccine coverage, vaccination, Mobile text messaging, short messaging  
29 service, SMS  
30  
31  
32  
33  
34  
35  
36  
37  
38  
39

40 **Word Count:** 2342  
41  
42  
43  
44  
45  
46  
47  
48  
49  
50  
51  
52  
53  
54  
55  
56  
57  
58  
59  
60

## ABSTRACT

**Background:** Low vaccine coverage is a major public health concern, the consequences of which contribute to around 1.5 million child deaths from vaccine-preventable diseases. Thus, innovative strategies to rapidly increase coverage and recall rates for vaccinations are urgently required. Mobile text messaging (or short messaging service, SMS) has the potential to help increase vaccination coverage and therefore we propose to conduct a review of the current best evidence for the use of SMS as an intervention to promote vaccination coverage.

**Methods/Design:** This article describes the protocol for a systematic review of the effectiveness of SMS in improving the uptake of vaccination. Primary and secondary outcomes of interest are pre-specified. We will preferably include randomized controlled trials (RCTs). However, non-randomized studies (NRS) will be considered if there is an inadequate number of RCTs. We will search several bibliographic databases (for example PubMed, EMBASE, CINAHL, CENTRAL, Science Citation Index, Africa-Wide Information, and WHOLIS electronic databases and search sources for grey literature. Following data extraction and assessment of risk of bias, we will meta-analyze studies and conduct sub-group analyses, according to intervention subtypes. We will assess clinical heterogeneity and statistical heterogeneity. For outcomes without quantitative data, a descriptive analysis will be used.

**Discussion:** Our results can be used by researchers and policy-makers to help inform them of the efficacy of mobile phone text messaging interventions to promote increased vaccination coverage.

## Strengths and limitations of this study

To our knowledge, this is the first systematic review protocol that will attempt to assess the impact of mobile text messaging on promoting the uptake of vaccination amongst adults, adolescents and parents or caregivers of children.

This study will help inform clinical practice and future studies on the effectiveness of media platforms.

Non-randomised studies of low-quality evidence may be this study's limitation. We will, however, conduct appropriate analyses to assess the overall robustness of the results.

## Background

Vaccinations, when given at the most sensitive developmental years of childhood, help to promote comprehensive and capable immunity, enabling children to fight off certain diseases [1 2]. In addition, vaccinations are widely regarded as one of the most cost-effective public health interventions that help to reduce global child morbidity and mortality [3 4]. Low coverage of vaccinations is a major public health concern. In Africa alone, more than seven million children did not receive the full spectrum of vaccinations recommended before reaching one year of age in 2009 [5]. It is also estimated that 1.5 million children died globally from vaccine-preventable diseases where World Health Organization (WHO) pre-qualified vaccines were available [6].

The Global Vaccine Action plan (GVAP) is the most recently launched global effort by the WHO to help increase vaccination coverage. The GVAP has set a target that by 2020 vaccination coverage for populations should reach 90% national vaccination coverage and at least 80% at district levels utilizing national vaccination programmes [7]. It is guided by six principles: country ownership, shared responsibility and partnership, equity, integration, sustainability, and innovation [8]

A variety of factors impact achieving low coverage rates; challenges such as immunisation awareness, demand for immunisation, level of trust in the health system, adequate human resources, access, timeliness of vaccinations, service delivery, poor infrastructure and vaccination monitoring [3]. Vaccination coverage seems to be lower in low-income households, where limited access to health education, contributes to poor

1  
2  
3 health-seeking behaviour along with an inability to improve general wellbeing [1 2 9].  
4  
5 Uneducated parents therefore are less likely to understand the importance of  
6  
7 vaccinating to prevent potentially harmful diseases. In light of these obstacles to  
8  
9 vaccination coverage, the strategy to improve vaccination coverage needs to be  
10  
11 innovative as alluded to in the GVAP, well thought out and able to penetrate low income  
12  
13 households effectively.  
14  
15

16  
17  
18 Globally, mobile phone use is rapidly increasing, with an estimated six billion mobile  
19  
20 phone users worldwide at the end of 2011 [10]. In particular, mobile phone text  
21  
22 messaging has gained popularity among people living in low- and middle-income  
23  
24 countries and may be the key to penetrating hard to reach areas in the developing  
25  
26 world. Text messaging has proven to be a cost effective method of relaying health  
27  
28 information and reminders than the more traditional methods such as face to face,  
29  
30 phone calls, pamphlets, mail and email [5]. As immunisation usually requires multiple  
31  
32 consecutive monthly visits after the first vaccine dose in order to complete the schedule,  
33  
34 short messaging service (SMS) can be used as reminder for an upcoming visit and recall  
35  
36 when a visit has been missed [1]. In addition, an SMS intervention, also known as mobile  
37  
38 phone text messaging, can be delivered alone or bundled with other interventions [11].  
39  
40 Diseases that have used mobile technology successfully include HIV where a 90%  
41  
42 adherence was observed among text message recipients compared with a 40%  
43  
44 adherence in the control group [12].  
45  
46  
47  
48  
49

50 We therefore propose to conduct a systematic review of the current best evidence for  
51  
52 the use of mobile phone text messaging to improve vaccination coverage.  
53  
54  
55  
56  
57  
58  
59  
60

## Methods

The review protocol has not been registered in any prospective registers of systematic reviews.

### Criteria for considering studies for this review

#### *Type of studies*

We will include randomized controlled trials (RCTs), interrupted time series and controlled before and after studies (CBA).

#### *Types of participants*

Participants will be adults, children or caregivers of those receiving vaccinations, in community-based settings.

#### *Types of interventions*

We will include interventions in which mobile phone text messages are used to promote uptake of vaccinations. The text messaging needs to be delivered to a person needing a vaccination, or in the case of an infant or child, to a caregiver. Eligible studies will be those that compared SMS to no intervention, or to other interventions for increasing vaccination coverage. If we find less than ten studies that include only SMS as the intervention, we will include studies in which mobile phone voice speaking or voice messaging are interventions; studies in which the use of a beeper or pager is the intervention; studies in which the use of multimedia messaging service is the



1  
2  
3 intervention; and studies in which text messages are bundled with other interventions.

4  
5 In such circumstances, we will stratify the analysis by type of intervention.

6  
7  
8  
9 ***Types of outcome measures***

10 Results must include quantitative data for outcomes measured.

11  
12  
13  
14 ***Primary outcomes:***

15  
16  
17 The primary outcome is vaccination coverage, irrespective of disease.

18  
19  
20  
21  
22 ***Secondary outcomes:***

23  
24 Secondary outcomes are the recall rate in persons who had previously missed their  
25  
26  
27  
28  
29  
30  
31  
32  
33  
34  
35  
36  
37  
38  
39  
40  
41  
42  
43  
44  
45  
46  
47  
48  
49  
50  
51  
52  
53  
54  
55  
56  
57  
58  
59  
60  
vaccinations.

31  
32 **Search methods for identification of studies**

33  
34 A comprehensive and exhaustive search will be performed by RK with the help of the  
35  
36  
37  
38  
39  
40  
41  
42  
43  
44  
45  
46  
47  
48  
49  
50  
51  
52  
53  
54  
55  
56  
57  
58  
59  
60  
University of Cape Town librarian, to identify all relevant studies available by 30 June  
2013, regardless of language or publication status. We will search both peer-reviewed  
journal articles and grey literature (unpublished, internal or non-reviewed papers and  
reports).

48  
49  
50  
51  
52  
53  
54  
55  
56  
57  
58  
59  
60  
***Database***

51  
52  
53  
54  
55  
56  
57  
58  
59  
60  
We will search the following electronic databases: PubMed; EMBASE; Cochrane Central  
Register of Controlled Trials (CENTRAL); ISI Web of Science (Science Citation Index);  
Africa-Wide Information, Cumulative Index of Nursing and Allied Health (CINAHL), and  
WHO library databases (WHOLIS). We will use both text words and medical subject

1  
2  
3 heading (MeSH) terms; for example vaccination\*, immunization\*, immunisation\*,  
4  
5 "Immunization"(MeSH), "Vaccination"(MeSH), "Immunization, Secondary"(MeSH) OR  
6  
7 "Immunization Programs"(MeSH), "Immunization Schedule"(MeSH), "Mass  
8  
9 Vaccination"(MeSH), mobile phone, text messaging, text\*, SMS, reminder\*, recall,  
10  
11 telemedicine, mHealth, and eHealth. These terms will be used in varying combinations.  
12  
13 The literature search strategy will be adapted to suit each database. Table 1 shows the  
14  
15 main search strategy we will use.  
16  
17  
18  
19

### 20 21 ***Conference proceedings***

22  
23 We will search the following conference proceedings for relevant abstracts: Vaccine and  
24  
25 International Society for Vaccines Congress, International African Vaccinology Conference,  
26  
27 Annual Vaccines Congress, Annual Conference on Vaccine Research, World Congress on  
28  
29 Pediatric Infectious Diseases, International Pediatric Association Conference, National  
30  
31 Immunization Conference, and the Annual Infectious Diseases in Children Symposium.  
32  
33  
34  
35  
36

### 37 38 ***Searching other sources***

39  
40 For ongoing studies, we will search the WHO International Clinical trials Registry  
41  
42 Platform, Clinicaltrials.gov, Pan African Clinical Trials Registry (PACTR), and contact  
43  
44 individual researchers working in the field as well as the following organizations: WHO,  
45  
46 Global Alliance for Vaccines and Immunisation, Centers for Disease Control and  
47  
48 Prevention, and mHealth Alliance. We will also search the website of mHealth Alliance  
49  
50 and mHealth in the Low Resource Settings resources database [20] for eligible studies.  
51  
52  
53  
54  
55  
56  
57  
58  
59  
60

### ***Reference lists***

We will obtain reference lists of relevant studies identified and the full-text articles reviewed for inclusion in the review will be checked for additional information.

### **Data collection and analysis**

The methods for data collection and analysis will be based on the Cochrane Handbook of Systematic Reviews for Interventions [13].

### ***Selection of studies***

We will construct a screening guide to ensure that the inclusion criteria are adhered to and consistently applied by all review authors. Two review authors (RK and ME), working independently, will screen the titles and abstracts of all studies identified through the literature searches for eligibility. RK will obtain the full text of studies deemed potentially eligible. The two authors (RK and ME) will independently assess the full text of each article for eligibility, and compare their results and resolve discrepancies by discussion and consensus, consulting a third author (CW) to resolve any persistent disagreements. For all studies excluded by the assessors we will describe the reasons for exclusion.

### ***Data extraction and management***

References will be managed using Thomson ISI Research-Soft Endnote 9.0 [14]. Two authors will independently extract descriptive and outcome data for each included article using a standardized data collection form, resolving any discrepancies by

1  
2  
3 discussion and consensus; failing which, a third author (CW) will arbitrate. RK will  
4  
5 enter the final data into the Cochrane Collaboration Review Manager Version 5.1  
6  
7 statistical software (<http://ims.cochrane.org/RevMan>). CW will crosscheck the data  
8  
9 entered to ensure that there are no data entry errors.  
10

### 11 12 13 14 ***Assessment of risk of bias in included studies***

15  
16 Two authors will independently assess the risk of bias in the included studies. Separate  
17  
18 criteria will be used to assess RCTs and non-randomized studies. The criteria used to  
19  
20 assess the risk of bias of in RCTs will be random sequence generation; allocation  
21  
22 concealment; blinding of participants, study personnel; blinding of outcome assessors;  
23  
24 incomplete outcome data; selective outcome reporting; other sources of bias, and  
25  
26 overall risk of bias, in accordance with the methods used by the Cochrane Collaboration  
27  
28 [13] as well as the Cochrane Consumers and Communication Review Group [15]. The  
29  
30 criteria used for risk of bias assessment for non-randomized studies will include  
31  
32 selection bias (with regard to comparability of groups, confounding and adjustment);  
33  
34 performance bias (in terms of the fidelity of the interventions, and quality of the  
35  
36 information regarding who received which interventions, including blinding of study  
37  
38 subjects and healthcare providers); detection bias (regarding unbiased and correct  
39  
40 assessment of outcomes, including blinding of assessors); attrition bias (with regard to  
41  
42 completeness of sample, follow-up and data); and reporting bias (with regard to  
43  
44 publication biases and selective reporting of results) [13]. Studies will be scored as  
45  
46 having low, high or unclear risk of bias. The two authors will resolve disagreements in  
47  
48 the assessment of risk of bias by discussion and consensus, consulting a third author to  
49  
50 resolve any persistent disagreements.  
51  
52  
53  
54  
55  
56  
57  
58  
59  
60

### ***Measures of treatment effect***

Data analysis will be conducted using the Cochrane Collaboration Review Manager Version 5.1 statistical software (<http://ims.cochrane.org/RevMan>). The outcomes of interest will be either dichotomous or continuous. We will calculate risk ratios and their corresponding 95% confidence intervals and P-values for dichotomous outcomes, and mean differences for continuous outcomes.

### ***Dealing with missing data***

In cases of missing or incomplete information presented in the included studies, we shall contact authors for further information.

### ***Data synthesis, assessment/investigation of heterogeneity***

We will assess clinical heterogeneity by examining types of participants, interventions, and outcomes in each study. We will pool data only from studies judged to be clinically homogenous. Statistical heterogeneity in each meta-analysis will be assessed using the chi-square test and quantified using the I-squared statistic. If studies are sufficiently homogenous (in terms of study populations, interventions, and outcomes), then we will pool the data across studies and estimate summary effect sizes using a fixed-effects model. Otherwise, we will use the random-effects model. We will perform subgroup analyses by intervention subtypes: long versus short messages; daily versus weekly messages; short weekly messages versus long weekly messages; short daily messages versus long daily messages; and two-way interactive communication versus one-way communication [16] [12 17]. We will also stratify analysis by study design (randomized controlled separate from non-randomized studies) and intervention type (multiple

1  
2  
3 interventions involving text messaging separate from text messaging alone). Finally, we  
4  
5 will use the grading of recommendations assessment, development, and evaluation  
6  
7 (GRADE) approach [18] to assess the quality of evidence for the effectiveness of the SMS  
8  
9 intervention. This method results in an assessment of the quality of the body of evidence  
10  
11 as high, moderate, low, or very low. Evidence is considered of high quality if 'further  
12  
13 research is very unlikely to change our confidence in the estimate of effect'; and  
14  
15 moderate quality if 'further research is likely to have an important impact on our  
16  
17 confidence in the estimate of effect and may change the estimate'. Low quality evidence  
18  
19 implies that 'further research is very likely to have an important impact on our  
20  
21 confidence in the estimate of effect and is likely to change the estimate', and very low  
22  
23 quality that 'we have very little confidence in the effect estimate'.  
24  
25  
26  
27  
28  
29  
30

### 31 ***Sensitivity analyses***

32  
33 Several sensitivity analyses will be performed: first to determine whether the study  
34  
35 design (RCT versus nonrandomized study) could influence the results of the meta-  
36  
37 analysis; second, to evaluate whether the model of the statistical method (random-  
38  
39 effects vs fixed-effects model) could change the results, and third, to determine the  
40  
41 impact of excluding studies with a high risk bias on the results, with emphasis on  
42  
43 allocation concealment, blinded outcome assessment, and losses to follow-up (with a cut  
44  
45 off of 25% loss to follow-up).  
46  
47  
48  
49  
50

### 51 **Presenting and reporting of results**

52  
53  
54 Findings in our systematic review will be presented in several ways. Flow diagrams will  
55  
56 be used to summarise the study selection process. Funnel plots will be used to assess  
57  
58  
59  
60

1  
2  
3 publication bias if we identify 10 or more eligible studies. The kappa statistic [19] will  
4  
5 be used to assess agreements between the full-text screening, data extraction and risk of  
6  
7 bias assessment by the two authors (RK and ME). GRADE summary of tables of findings,  
8  
9 risk of bias tables or graphs, and forest plots will also be used where appropriate. The  
10  
11 reporting of outcomes without quantitative data will be descriptive. Lastly, we will  
12  
13 provide a list of excluded studies with reasons for exclusion.  
14  
15  
16  
17  
18

### 19 **Ethics**

20  
21  
22 Systematic reviews draw on publicly available data and do not directly involve human  
23  
24 subjects, and therefore do not require formal ethical review [20]. The study protocol  
25  
26 will be reviewed by supervisors with expertise in methodology (systematic review) and  
27  
28 submitted to the University of Cape Town Departmental Research Committee for  
29  
30 approval.  
31  
32  
33  
34  
35  
36  
37  
38  
39  
40  
41  
42  
43  
44  
45  
46  
47  
48  
49  
50  
51  
52  
53  
54  
55  
56  
57  
58  
59  
60

## Discussion

### *Expected significance of the study*

The findings of this systematic review will have implications for policy, practice and research. We will discuss the relevance of our findings to childhood immunisation programmes in Africa in the decade of vaccines with emphasis on applicability, effects on equity, cost implications, and monitoring and evaluation.

Our systematic review will provide evidence of whether policy-makers can adopt mobile phone text messaging alone or in combination with other interventions in efforts to improve uptake of vaccines in national immunisation programmes. It will also inform clinic or hospital managers of how best to use the intervention to improve vaccination coverage. The systematic review may also identify specific considerations that would need to be taken into account for future studies, such as study location, content and timing of messages, whether or not parents or caregivers replied to text messages, how text messages were sent (automated versus manual), indicators for immunisation programmes, variety of text messages sent (inclusion of jokes or lifestyle tips), duration of the study, whether or not participants were provided with the mobile handsets, and sample size [21].

### **Abbreviations**

WHO: World Health Organization; GVAP: Global Vaccine Action plan; SMS: Short messaging service; RCT: Randomized Controlled Trials; CBA: Controlled Before and After study; MeSH: medical subject heading;



**Contributorship Statement**

RK and ME drafted the protocol.

CW conceived of the review.

All authors developed the design of the protocol and will be involved in data acquisition.

All authors have given their approval for publication of the protocol

**Competing Interests**

None

## References

1. Garde M. Inequalities in child survival: Looking at wealth and other socio-economic disparities in developing countries.  
[http://www.savethechildren.org.uk/sites/default/files/docs/Final\\_draft\\_inequalities\\_of\\_child\\_survival\\_10\\_August\\_formatted\\_2\\_1.pdf](http://www.savethechildren.org.uk/sites/default/files/docs/Final_draft_inequalities_of_child_survival_10_August_formatted_2_1.pdf) [Accessed August 5th 2012] 2010
2. Multiple Authors. Vaccines & Preventable Diseases. National Center for Immunization and Respiratory Disease. <http://www.cdc.gov/vaccines/vpd-vac/default.htm> 2009
3. Machingaidze S, Wiysonge CS, Hussey GD. Strengthening the expanded programme on immunization in Africa: looking beyond 2015. *PLoS medicine* 2013;**10**(3):e1001405 doi: 10.1371/journal.pmed.1001405 [published Online First: Epub Date]].
4. Bloom DE. The value of vaccination. *Advances in experimental medicine and biology* 2011;**697**:1-8 doi: 10.1007/978-1-4419-7185-2\_1 [published Online First: Epub Date]].
5. Stockwell MS, Kharbanda EO, Martinez RA, et al. Text4Health: impact of text message reminder-recalls for pediatric and adolescent immunizations. *American journal of public health* 2012;**102**(2):e15-21 doi: 10.2105/AJPH.2011.300331 [published Online First: Epub Date]].
6. World Health Organisation and UNICEF: Global Immunization Data. World Health Organisation and UNICEF: Global Immunization Data.  
[[http://www.who.int/immunization\\_monitoring/Global\\_Immunization\\_Data.pdf](http://www.who.int/immunization_monitoring/Global_Immunization_Data.pdf)]  
Accessed 10 June 2013
7. WHO Global Vaccination Action Plan.  
[[http://www.who.int/immunization\\_monitoring/Global\\_Immunization\\_Data.pdf](http://www.who.int/immunization_monitoring/Global_Immunization_Data.pdf)]  
Accessed 10 June 2013
8. Decade of Vaccines (DoV) Collaboration: Draft global vaccine action plan.  
[<http://www.dovcollaboration.org/action-plan/>] Accessed 10 June 2013.

- 1  
2  
3 9. Kaewkungwal J, Singhasivanon P, Khamsiriwatchara A, et al. Application of smart phone in "Better  
4  
5 Border Healthcare Program": a module for mother and child care. BMC medical informatics  
6  
7 and decision making 2010;**10**:69 doi: 10.1186/1472-6947-10-69[published Online First: Epub  
8  
9 Date]].  
10
- 11  
12 10. Roter DL, Hall JA, Merisca R, et al. Effectiveness of interventions to improve patient compliance: a  
13  
14 meta-analysis. Medical care 1998;**36**(8):1138-61  
15
- 16  
17 11. Mohammed S, Siddiqi O, Ali O, et al. User engagement with and attitudes towards an interactive  
18  
19 SMS reminder system for patients with tuberculosis. J Telemed Telecare 2012;**18**(7):404-8  
20  
21 doi: 10.1258/jtt.2012.120311[published Online First: Epub Date]].  
22
- 23  
24 12. Pop-Eleches C, Thirumurthy H, Habyarimana JP, et al. Mobile phone technologies improve  
25  
26 adherence to antiretroviral treatment in a resource-limited setting: a randomized controlled  
27  
28 trial of text message reminders. AIDS 2011;**25**(6):825-34 doi:  
29  
30 10.1097/QAD.0b013e32834380c1[published Online First: Epub Date]].  
31
- 32  
33 13. Higgins JPT, Green S, (editors). *Cochrane Handbook for Systematic Reviews of Interventions*.  
34  
35 *Version 5.0.2 [updated September 2009]. The Cochrane Collaboration, 2009. Available from*  
36  
37 <http://www.cochrane-handbook.org>, 2009.  
38
- 39  
40 14. Thomson. <http://www.endnote.com>. ISI Research-Soft Endnote 90  
41
- 42  
43 15. Ryan R HS, Pictor M, McKenzie J; Cochrane Consumers and Communication Review Group.  
44  
45 Study Quality Guide.  
46  
47 [http://ccrgcochraneorg/sites/ccrgcochraneorg/files/uploads/StudyQualityGuide\\_Ma](http://ccrgcochraneorg/sites/ccrgcochraneorg/files/uploads/StudyQualityGuide_Ma)  
48  
49 y2011pdf (accessed 01 February 2013) 2011  
50
- 51  
52 16. Horvath T, Azman H, Kennedy GE, et al. Mobile phone text messaging for promoting adherence  
53  
54 to antiretroviral therapy in patients with HIV infection. Cochrane Database Syst Rev  
55  
56 2012;**3**:CD009756 doi: 10.1002/14651858.CD009756[published Online First: Epub Date]].  
57  
58  
59  
60

- 1  
2  
3 17. Thirumurthy H, Lester RT. M-health for health behaviour change in resource-limited settings:  
4 applications to HIV care and beyond. Bulletin of the World Health Organization  
5 2012;**90**(5):390-2 doi: 10.2471/BLT.11.099317[published Online First: Epub Date]].  
6  
7  
8  
9 18. Balshem H, Helfand M, Schunemann HJ, et al. GRADE guidelines: 3. Rating the quality of  
10 evidence. J Clin Epidemiol 2011;**64**(4):401-6 doi: 10.1016/j.jclinepi.2010.07.015[published  
11 Online First: Epub Date]].  
12  
13  
14  
15 19. Landis JR, Koch GG. The measurement of observer agreement for categorical data. Biometrics  
16 1977;**33**(1):159-74  
17  
18  
19  
20 20. Emanuel EJ, Wendler D, Killen J, et al. What makes clinical research in developing countries  
21 ethical? The benchmarks of ethical research. J Infect Dis 2004;**189**(5):930-7 doi:  
22 10.1086/381709[published Online First: Epub Date]].  
23  
24  
25  
26  
27 21. Karanja S, Mbuagbaw L, Ritvo P, et al. A workshop report on HIV mHealth synergy and strategy  
28 meeting to review emerging evidence-based mHealth interventions and develop a  
29 framework for scale-up of these interventions. The Pan African medical journal 2011;**10**:37  
30  
31  
32  
33  
34  
35  
36  
37  
38  
39  
40  
41  
42  
43  
44  
45  
46  
47  
48  
49  
50  
51  
52  
53  
54  
55  
56  
57  
58  
59  
60

Table 1. PubMed search strategy, modified as needed for use in other databases

| Search | PubMed                                                                                                 |
|--------|--------------------------------------------------------------------------------------------------------|
| #1     | (immunization[Mesh]) OR ( immunis* OR immuniz* OR vaccin*)                                             |
| #2     | (adolescents OR children OR teenagers)                                                                 |
| #3     | "SMS" OR cellphone OR "mobile phone" OR "text messaging" OR "short message service" OR "text reminder" |
| #4     | #1 AND #2                                                                                              |
| #5     | #3 AND #4                                                                                              |

MeSH, medical subject heading

# BMJ Open

## Mobile phone text messaging for improving the uptake of vaccinations: a systematic review protocol

|                                 |                                                                                                                                                                                                                                                                                                                                                       |
|---------------------------------|-------------------------------------------------------------------------------------------------------------------------------------------------------------------------------------------------------------------------------------------------------------------------------------------------------------------------------------------------------|
| Journal:                        | <i>BMJ Open</i>                                                                                                                                                                                                                                                                                                                                       |
| Manuscript ID:                  | bmjopen-2014-005130.R1                                                                                                                                                                                                                                                                                                                                |
| Article Type:                   | Protocol                                                                                                                                                                                                                                                                                                                                              |
| Date Submitted by the Author:   | 23-Jun-2014                                                                                                                                                                                                                                                                                                                                           |
| Complete List of Authors:       | Kalan, Robyn; University of Cape Town, Pediatric Medicine<br>Wiysonge, Charles; Stellenbosch University, Centre for Evidence-Based Health Care<br>Ramafuthole, Tshepiso; University of Cape Town, FHS<br>Allie, Kurt; University of Cape Town, FHS<br>Ebrahim, Fatima; University of Cape Town, FHS<br>Engel, Mark; University of Cape Town, Medicine |
| <b>Primary Subject Heading</b>: | Infectious diseases                                                                                                                                                                                                                                                                                                                                   |
| Secondary Subject Heading:      | Global health, Paediatrics, Public health                                                                                                                                                                                                                                                                                                             |
| Keywords:                       | Vaccine coverage, vaccination, Mobile text messaging, short messaging service, SMS                                                                                                                                                                                                                                                                    |
|                                 |                                                                                                                                                                                                                                                                                                                                                       |

SCHOLARONE™  
Manuscripts

1  
2  
3 **Mobile phone text messaging for improving the uptake of vaccinations: a**  
4 **systematic review protocol**  
5  
6  
7

8 Robyn Kalan

9  
10 Department of Medicine, Faculty of Health Sciences, University of Cape Town, Anzio  
11 Road, Observatory 7925, Cape Town, South Africa

12 Robyn.kalan@gmail.com  
13

14  
15 Charles S. Wiysonge

16  
17 Department of Interdisciplinary Health Sciences, Faculty of Medicine and Health  
18 Sciences, Stellenbosch University, Tygerberg 7505, Cape Town, South Africa

19 charlesw@sun.ac.za  
20  
21

22  
23 Tshepiso Ramafuthole

24  
25 Faculty of Health Sciences, University of Cape Town, Anzio Road, Observatory 7925,  
26 Cape Town, South Africa

27 rmftsh001@myuct.ac.za  
28  
29

30  
31 Kurt Allie

32  
33 Faculty of Health Sciences, University of Cape Town, Anzio Road, Observatory 7925,  
34 Cape Town, South Africa

35 allkur003@myuct.ac.za  
36  
37

38  
39 Fatima Ebrahim

40  
41 Faculty of Health Sciences, University of Cape Town, Anzio Road, Observatory 7925,  
42 Cape Town, South Africa

43 ebrfat010@myuct.ac.za  
44  
45

46  
47 Mark Emmanuel Engel

48  
49 Department of Medicine, Faculty of Health Sciences, University of Cape Town, Anzio  
50 Road, Observatory 7925, Cape Town, South Africa

51 mark.engel@uct.ac.za  
52  
53  
54  
55  
56  
57  
58  
59  
60

**\*Corresponding author**

Dr Mark Emmanuel Engel

Department of Medicine, University of Cape Town

J46-43, Old Main Building, Groote Schuur Hospital

Anzio Road, Observatory 7925, South Africa

Phone: +27 21 404 7676

Fax: 27 21 448 6815

E: mark.engel@uct.ac.za

**Keywords:** Vaccine coverage, vaccination, Mobile text messaging, short messaging service, SMS

**Word Count:** 2424



## ABSTRACT

**Introduction:** Low vaccine coverage is a major public health concern, the consequences of which contribute to around 1.5 million child deaths from vaccine-preventable diseases. Thus, innovative strategies to rapidly increase coverage and recall rates for vaccinations are urgently required. Mobile text messaging (or short messaging service, SMS) has the potential to help increase vaccination coverage and therefore we propose to conduct a review of the current best evidence for the use of SMS as an intervention to promote vaccination coverage.

**Methods and Analysis:** This article describes the protocol for a systematic review of the effectiveness of SMS in improving the uptake of vaccination. Primary and secondary outcomes of interest are pre-specified. We will preferably include randomized controlled trials (RCTs). However, non-randomized studies (NRS) will be considered if there is an inadequate number of RCTs. We will search several bibliographic databases (for example PubMed, EMBASE, CINAHL, CENTRAL, Science Citation Index, Africa-Wide Information, and WHOLIS electronic databases and search sources for grey literature. Following data extraction and assessment of risk of bias, we will meta-analyze studies and conduct sub-group analyses, according to intervention subtypes. We will assess clinical heterogeneity and statistical heterogeneity. For outcomes without quantitative data, a descriptive analysis will be used. This review protocol is registered in the PROSPERO International Prospective Register of systematic reviews, registration number 2014:CRD42014007531

1  
2  
3 **Ethics and dissemination:** Ethics is not required for this study, given that this is a  
4  
5  
6 protocol for a systematic review, which uses published data. This findings of this study  
7  
8 will be disseminated through peer-reviewed publications and conference presentations.  
9  
10 We anticipate that the results could be used by researchers and policy-makers to help  
11  
12 inform them of the efficacy of mobile phone text messaging interventions to promote  
13  
14 increased vaccination coverage.  
15  
16  
17  
18  
19  
20

### 21 **Strengths and limitations of this study**

- 24 • To our knowledge, this is the first systematic review protocol that will attempt to  
25 assess the impact of mobile text messaging on promoting the uptake of  
26 vaccination amongst adults, adolescents and parents or caregivers of children.  
27  
28
- 29 • This study will help inform clinical practice and future studies on the  
30 effectiveness of media platforms.  
31  
32
- 33 • Non-randomised studies of low-quality evidence may be this study's limitation.  
34  
35 We will, however, conduct appropriate analyses to assess the overall robustness  
36 of the results.  
37  
38  
39  
40  
41  
42  
43  
44  
45  
46  
47  
48  
49  
50  
51  
52  
53  
54  
55  
56  
57  
58  
59  
60

## Introduction

Vaccinations, when given at the most sensitive developmental years of childhood, help to promote comprehensive and capable immunity, enabling children to fight off certain diseases [1 2]. In addition, vaccinations are widely regarded as one of the most cost-effective public health interventions that help to reduce global child morbidity and mortality [3 4]. Low coverage of vaccinations is a major public health concern. In Africa alone, more than seven million children did not receive the full spectrum of vaccinations recommended before reaching one year of age in 2009 [5]. It is also estimated that 1.5 million children died globally from vaccine-preventable diseases where World Health Organization (WHO) pre-qualified vaccines were available [6].

The Global Vaccine Action plan (GVAP) is the most recently launched global effort by the WHO to help increase vaccination coverage. The GVAP has set a target that by 2020 vaccination coverage for populations should reach 90% national vaccination coverage and at least 80% at district levels utilizing national vaccination programmes [7]. It is guided by six principles: country ownership, shared responsibility and partnership, equity, integration, sustainability, and innovation [8]

A variety of factors impact achieving low coverage rates; challenges such as immunisation awareness, demand for immunisation, level of trust in the health system, adequate human resources, access, timeliness of vaccinations, service delivery, poor infrastructure and vaccination monitoring [4]. Vaccination coverage seems to be lower in low-income households, where limited access to health education, contributes to poor

1  
2  
3 health-seeking behaviour along with an inability to improve general wellbeing [1 2 9].  
4  
5 Uneducated parents therefore are less likely to understand the importance of  
6  
7 vaccinating to prevent potentially harmful diseases. In light of these obstacles to  
8  
9 vaccination coverage, the strategy to improve vaccination coverage needs to be  
10  
11 innovative as alluded to in the GVAP, well thought out and able to penetrate low income  
12  
13 households effectively.  
14  
15

16  
17  
18 Globally, mobile phone use is rapidly increasing, with an estimated six billion mobile  
19  
20 phone users worldwide at the end of 2011 [10]. In particular, mobile phone text  
21  
22 messaging has gained popularity among people living in low- and middle-income  
23  
24 countries and may be the key to penetrating hard to reach areas in the developing  
25  
26 world. Text messaging has proven to be a cost effective method of relaying health  
27  
28 information and reminders than the more traditional methods such as face-to-face,  
29  
30 phone calls, pamphlets, mail and email [5]. As immunisation usually requires multiple  
31  
32 consecutive monthly visits after the first vaccine dose in order to complete the schedule,  
33  
34 short messaging service (SMS) can be used as reminder for an upcoming visit and recall  
35  
36 when a visit has been missed [1]. In addition, an SMS intervention, also known as mobile  
37  
38 phone text messaging, can be delivered alone or bundled with other interventions [11].  
39  
40 Diseases that have used mobile technology successfully include HIV where a 90%  
41  
42 adherence was observed among text message recipients compared with a 40%  
43  
44 adherence in the control group [12]. We therefore propose to conduct a systematic  
45  
46 review of the current best evidence for the use of mobile phone text messaging to  
47  
48 improve vaccination coverage.  
49  
50  
51  
52  
53  
54  
55  
56  
57  
58  
59  
60

## Methods

This review protocol has been published in the PROSPERO International Prospective Register of systematic reviews (<http://www.crd.york.ac.uk/PROSPERO>), registration number 2014:CRD42014007531.

### Criteria for considering studies for this review

#### *Type of studies*

We will include randomized controlled trials (RCTs), interrupted time series and controlled before and after studies (CBA).

#### *Types of participants*

Participants will be caregivers of infants or children, adolescents and adults including pregnant women drawn from any setting, community-based or otherwise.

#### *Types of interventions*

We will include interventions in which mobile phone text messages serve as a reminder to be vaccinated, as educational information or, as information regarding vaccine availability at the clinic in an attempt to promote uptake of vaccinations. Vaccinations could include routine infant immunisations, those against human papilloma virus, influenza, meningococcal (MCV4) or tetanus/diphtheria/acellular pertussis (Tdap). Eligible studies will be those that compared SMS to no intervention, or to other interventions for increasing vaccination coverage. If we find less than ten studies that include only SMS as the intervention, we will include studies in which mobile phone voice speaking or voice messaging are

1  
2  
3 interventions; studies in which the use of a beeper or pager is the intervention; studies  
4  
5 in which the use of multimedia messaging service is the intervention; and studies in  
6  
7 which text messages are bundled with other interventions. In such circumstances, we  
8  
9 will stratify the analysis by type of intervention.  
10

### 11 12 13 ***Types of outcome measures***

14  
15 Results must include quantitative data for outcomes measured.  
16

### 17 18 19 ***Primary outcomes:***

20  
21 The primary outcome is vaccination coverage, irrespective of disease. We will use the  
22  
23 definition of vaccine coverage as stipulated by the respective authors.  
24  
25

### 26 27 28 29 ***Secondary outcomes:***

30  
31 Secondary outcomes are the recall rate in persons who had previously missed their  
32  
33 vaccinations, scheduled appointments for vaccination or completeness of vaccination  
34  
35 records.  
36  
37

### 38 39 40 **Search methods for identification of studies**

41  
42 A comprehensive and exhaustive search of databases and conference proceedings will be  
43  
44 performed by RK with the help of the University of Cape Town librarian, to identify all  
45  
46 relevant studies available by 30 June 2014, regardless of language or publication status.  
47  
48 We will search both peer-reviewed journal articles and grey literature (unpublished,  
49  
50 internal or non-reviewed papers and reports).  
51  
52  
53  
54  
55  
56  
57  
58  
59  
60

### ***Database***

We will search the following electronic databases: PubMed; EMBASE; Cochrane Central Register of Controlled Trials (CENTRAL); ISI Web of Science (Science Citation Index); Africa-Wide Information, Cumulative Index of Nursing and Allied Health (CINAHL), and WHO library databases (WHOLIS). We will use both text words and medical subject heading (MeSH) terms; for example vaccination\*, immunization\*, immunisation\*, "Immunization"(MeSH), "Vaccination"(MeSH), "Immunization, Secondary"(MeSH) OR "Immunization Programs"(MeSH), "Immunization Schedule"(MeSH), "Mass Vaccination"(MeSH), mobile phone, text messaging, text\*, SMS, reminder\*, recall, telemedicine, mHealth, and eHealth. These terms will be used in varying combinations. The literature search strategy will be adapted to suit each database. Table 1 shows the main search strategy we will use.

### ***Conference proceedings***

We will search the following conference proceedings for relevant abstracts: Vaccine and International Society for Vaccines Congress, International African Vaccinology Conference, Annual Vaccines Congress, Annual Conference on Vaccine Research, World Congress on Pediatric Infectious Diseases, International Pediatric Association Conference, National Immunization Conference, and the Annual Infectious Diseases in Children Symposium.

### ***Searching other sources***

For ongoing studies, we will search the WHO International Clinical trials Registry Platform, Clinicaltrials.gov, Pan African Clinical Trials Registry (PACTR), and contact individual researchers working in the field as well as the following organizations: WHO,

1  
2  
3 Global Alliance for Vaccines and Immunisation, Centers for Disease Control and  
4  
5 Prevention, and mHealth Alliance. We will also search the website of mHealth Alliance  
6  
7 and mHealth in the Low Resource Settings resources database for eligible studies.  
8  
9

### 10 11 12 ***Reference lists***

13  
14  
15 We will obtain reference lists of relevant studies identified and the full-text articles  
16  
17 reviewed for inclusion in the review will be checked for additional information.  
18  
19

### 20 21 22 **Data collection and analysis**

23  
24  
25 The methods for data collection and analysis will be based on the Cochrane Handbook of  
26  
27 Systematic Reviews for Interventions [13].  
28  
29

### 30 31 32 ***Selection of studies for inclusion***

33  
34  
35 We will construct a screening guide to ensure that the inclusion criteria are adhered to  
36  
37 and consistently applied by all review authors. Two review authors (RK and ME),  
38  
39 working independently, will screen the titles and abstracts of all studies identified  
40  
41 through the literature searches for eligibility. RK will obtain the full text of studies  
42  
43 deemed potentially eligible. The two authors (RK and ME) will independently assess the  
44  
45 full text of each article for eligibility, and compare their results and resolve  
46  
47 discrepancies by discussion and consensus, consulting a third author (CW) to resolve  
48  
49 any persistent disagreements. For all studies excluded by the assessors we will describe  
50  
51 the reasons for exclusion.  
52  
53  
54  
55  
56  
57  
58  
59  
60



### ***Assessment of risk of bias in included studies***

Two authors will independently assess the risk of bias in the included studies. Separate criteria will be used to assess RCTs and non-randomized studies. The criteria used to assess the risk of bias of in RCTs will be random sequence generation; allocation concealment; blinding of participants, study personnel; blinding of outcome assessors; incomplete outcome data; selective outcome reporting; other sources of bias, and overall risk of bias, in accordance with the methods used by the Cochrane Collaboration [13] as well as the Cochrane Consumers and Communication Review Group[14]. The criteria used for risk of bias assessment for non-randomized studies will include selection bias (with regard to comparability of groups, confounding and adjustment); performance bias (in terms of the fidelity of the interventions, and quality of the information regarding who received which interventions, including blinding of study subjects and healthcare providers); detection bias (regarding unbiased and correct assessment of outcomes, including blinding of assessors); attrition bias (with regard to completeness of sample, follow-up and data); and reporting bias (with regard to publication biases and selective reporting of results) [13]. Studies will be scored as having low, high or unclear risk of bias. The two authors will resolve disagreements in the assessment of risk of bias by discussion and consensus, consulting a third author to resolve any persistent disagreements.

### ***Data extraction and management***

References will be managed using Thomson ISI Research-Soft Endnote 9.0 [15]. Two authors will independently extract descriptive and outcome data for each included article using a standardized data collection form, resolving any discrepancies by discussion and consensus; failing which, a third author (CW) will arbitrate. RK will

1  
2  
3 enter the final data into the Cochrane Collaboration Review Manager Version 5.1  
4 statistical software (<http://ims.cochrane.org/RevMan>). CW will crosscheck the data  
5  
6 entered to ensure that there are no data entry errors.  
7  
8  
9

### 10 11 12 ***Data synthesis including assessment of heterogeneity*** 13

14  
15 Data analysis will be conducted using the Cochrane Collaboration Review Manager  
16 Version 5.1 statistical software (<http://ims.cochrane.org/RevMan>). The outcomes of  
17 interest will be either dichotomous or continuous. We will calculate risk ratios and their  
18 corresponding 95% confidence intervals and P-values for dichotomous outcomes, and  
19 mean differences and standard deviations for continuous outcomes. Where outcomes are  
20 measured using different scales, we will report standardised mean differences (SMD) [16]. In  
21 cases of missing or incomplete information presented in the included studies, we shall  
22 contact authors for further information.  
23  
24  
25  
26  
27  
28  
29  
30  
31  
32

33  
34  
35 We will assess clinical heterogeneity by examining types of participants, interventions,  
36 and outcomes in each study. We will pool data only from studies judged to be clinically  
37 homogenous. Statistical heterogeneity in each meta-analysis will be assessed using the  
38 chi-square test and quantified using the I-squared statistic [17] . If studies are  
39 sufficiently homogenous (in terms of study populations, interventions, and outcomes),  
40 then we will pool the data across studies and estimate summary effect sizes using a  
41 fixed-effects model. Otherwise, we will use the random-effects model. Should  
42 heterogeneity remain significant, we will discuss the findings as a narrative summary.  
43  
44  
45  
46  
47  
48  
49  
50  
51  
52  
53  
54  
55  
56  
57  
58  
59  
60

1  
2  
3 We will perform subgroup analyses by intervention subtypes: long versus short  
4 messages; daily versus weekly messages; short weekly messages versus long weekly  
5 messages; short daily messages versus long daily messages; and two-way interactive  
6 communication versus one-way communication [12 18 19]. We will also stratify analysis  
7 by study design (randomized controlled separate from non-randomized studies) and  
8 intervention type (multiple interventions involving text messaging separate from text  
9 messaging alone). We will also conduct a subgroup comparison of self-reported vaccination  
10 completion versus verified clinic records as well as according to age categories and country  
11 setting.  
12  
13  
14  
15  
16  
17  
18  
19  
20  
21  
22  
23  
24

25 Finally, we will use the grading of recommendations assessment, development, and  
26 evaluation (GRADE) approach [20] to assess the quality of evidence for the effectiveness  
27 of the SMS intervention. This method results in an assessment of the quality of the body  
28 of evidence as high, moderate, low, or very low. Evidence is considered of high quality if  
29 'further research is very unlikely to change our confidence in the estimate of effect'; and  
30 moderate quality if 'further research is likely to have an important impact on our  
31 confidence in the estimate of effect and may change the estimate'. Low quality evidence  
32 implies that 'further research is very likely to have an important impact on our  
33 confidence in the estimate of effect and is likely to change the estimate', and very low  
34 quality that 'we have very little confidence in the effect estimate'.  
35  
36  
37  
38  
39  
40  
41  
42  
43  
44  
45  
46  
47  
48  
49  
50

### 51 ***Sensitivity analyses***

52  
53  
54 Several sensitivity analyses will be performed: first to determine whether the study  
55 design (RCT versus nonrandomized study) could influence the results of the meta-  
56  
57  
58  
59  
60

1  
2  
3 analysis; second, to evaluate whether the model of the statistical method (random-  
4 effects vs fixed-effects model) could change the results, and third, to determine the  
5 impact of excluding studies with a high risk bias on the results, with emphasis on  
6 allocation concealment, blinded outcome assessment, and losses to follow-up (with a cut  
7 off of 25% loss to follow-up).  
8  
9  
10  
11  
12

### 13 14 15 16 **Reporting of this review** 17

18  
19 Findings in our systematic review will be presented in several ways. Flow diagrams will  
20 be used to summarise the study selection process. Funnel plots will be used to assess  
21 publication bias if we identify 10 or more eligible studies. The kappa statistic [21] will  
22 be used to assess agreements between the full-text screening, data extraction and risk of  
23 bias assessment by the two authors (RK and ME). GRADE summary of tables of findings,  
24 risk of bias tables or graphs, and forest plots will also be used where appropriate. The  
25 reporting of outcomes without quantitative data will be descriptive. Lastly, we will  
26 provide a list of excluded studies with reasons for exclusion.  
27  
28  
29  
30  
31  
32  
33  
34  
35  
36  
37  
38  
39

### 40 **Ethics and dissemination** 41

42  
43 Systematic reviews draw on publicly available data and do not directly involve human  
44 subjects, and therefore do not require formal ethical review [22]. The study protocol  
45 will be reviewed by supervisors with expertise in methodology (systematic review) and  
46 submitted to the University of Cape Town Departmental Research Committee for  
47 approval.  
48  
49  
50  
51  
52  
53  
54  
55  
56  
57  
58  
59  
60

1  
2  
3 The findings of this systematic review will have implications for policy, practice and  
4  
5 research. We will discuss the relevance of our findings to childhood immunisation  
6  
7 programmes in Africa in the decade of vaccines with emphasis on applicability, effects  
8  
9 on equity, cost implications, and monitoring and evaluation. Our systematic review will  
10  
11 provide evidence of whether policy-makers can adopt mobile phone text messaging  
12  
13 alone or in combination with other interventions in efforts to improve uptake of  
14  
15 vaccines in national immunisation programmes. It will also inform clinic or hospital  
16  
17 managers of how best to use the intervention to improve vaccination coverage. The  
18  
19 systematic review may also identify specific considerations that would need to be taken  
20  
21 into account for future studies, such as study location, content and timing of messages,  
22  
23 whether or not parents or caregivers replied to text messages, how text messages were  
24  
25 sent (automated versus manual), indicators for immunisation programmes, variety of  
26  
27 text messages sent (inclusion of jokes or lifestyle tips), duration of the study, whether or  
28  
29 not participants were provided with the mobile handsets, and sample size [23].  
30  
31  
32  
33  
34  
35  
36  
37

### 38 **Abbreviations**

39  
40 WHO: World Health Organization; GVAP: Global Vaccine Action plan; SMS: Short  
41  
42 messaging service; RCT: Randomized Controlled Trials; CBA: Controlled Before and  
43  
44 After study; MeSH: medical subject heading;  
45  
46  
47  
48  
49  
50  
51  
52  
53  
54  
55  
56  
57  
58  
59  
60

### **Acknowledgements**

The authors would like to acknowledge the critical input and support of the Evidence-Based Medicine Research Support Unit, Faculty of Health Sciences, University of Cape Town.

### **Contributionship statement**

Robyn Kalan, BSc (Hons) Nursing is a research fellow. Tshepiso Ramafuthole, Kurt Allie and Fatima Ebrahim are MBChB students. Mark Engel, MPH, PhD and Charles Wiysonge, MD, PhD are senior researchers.

CW, TR, KA, and FE conceived of the review. All authors developed the design of the protocol and will be involved in data acquisition. RK undertook the drafting of the manuscript. RK and ME will analyze the data and participate in the interpretation of the results. All authors have given their approval for publication.

### **Competing interests**

The authors declare that they have no competing interests.

### **Funding**

We did not receive any dedicated funding for this manuscript.

## References

1. Garde M. Inequalities in child survival: Looking at wealth and other socio-economic disparities in developing countries.  
[http://www.savethechildren.org.uk/sites/default/files/docs/Final\\_draft\\_inequalities\\_of\\_child\\_survival\\_10\\_August\\_formatted\\_2\\_1.pdf](http://www.savethechildren.org.uk/sites/default/files/docs/Final_draft_inequalities_of_child_survival_10_August_formatted_2_1.pdf) [Accessed August 5th 2012] 2010
2. Multiple Authors. Vaccines & Preventable Diseases. National Center for Immunization and Respiratory Disease. <http://www.cdc.gov/vaccines/vpd-vac/default.htm> 2009
3. Bloom DE. The value of vaccination. *Advances in experimental medicine and biology* 2011;**697**:1-8 doi: 10.1007/978-1-4419-7185-2\_1 [published Online First: Epub Date]].
4. Machingaidze S, Wiysonge CS, Hussey GD. Strengthening the expanded programme on immunization in Africa: looking beyond 2015. *PLoS medicine* 2013;**10**(3):e1001405 doi: 10.1371/journal.pmed.1001405 [published Online First: Epub Date]].
5. Stockwell MS, Kharbanda EO, Martinez RA, et al. Text4Health: impact of text message reminder-recalls for pediatric and adolescent immunizations. *American journal of public health* 2012;**102**(2):e15-21 doi: 10.2105/AJPH.2011.300331 [published Online First: Epub Date]].
6. World Health Organisation and UNICEF: Global Immunization Data. World Health Organisation and UNICEF: Global Immunization Data.  
[[http://www.who.int/immunization\\_monitoring/Global\\_Immunization\\_Data.pdf](http://www.who.int/immunization_monitoring/Global_Immunization_Data.pdf)]  
Accessed 10 June 2013
7. WHO Global Vaccination Action Plan.  
[[http://www.who.int/immunization\\_monitoring/Global\\_Immunization\\_Data.pdf](http://www.who.int/immunization_monitoring/Global_Immunization_Data.pdf)]  
Accessed 10 June 2013
8. Decade of Vaccines (DoV) Collaboration: Draft global vaccine action plan.  
[<http://www.dovcollaboration.org/action-plan/>] Accessed 10 June 2013
9. Kaewkungwal J, Singhasivanon P, Khamsiriwatchara A, et al. Application of smart phone in "Better Border Healthcare Program": a module for mother and child care. *BMC medical informatics and decision making* 2010;**10**:69 doi: 10.1186/1472-6947-10-69 [published Online First: Epub Date]].
10. Roter DL, Hall JA, Merisca R, et al. Effectiveness of interventions to improve patient compliance: a meta-analysis. *Medical care* 1998;**36**(8):1138-61
11. Mohammed S, Siddiqi O, Ali O, et al. User engagement with and attitudes towards an interactive SMS reminder system for patients with tuberculosis. *J Telemed Telecare* 2012;**18**(7):404-8 doi: 10.1258/jtt.2012.120311 [published Online First: Epub Date]].
12. Pop-Eleches C, Thirumurthy H, Habyarimana JP, et al. Mobile phone technologies improve adherence to antiretroviral treatment in a resource-limited setting: a randomized controlled trial of text message reminders. *AIDS* 2011;**25**(6):825-34 doi: 10.1097/QAD.0b013e32834380c1 [published Online First: Epub Date]].
13. Higgins JPT, Green S, (editors). *Cochrane Handbook for Systematic Reviews of Interventions. Version 5.0.2 [updated September 2009]. The Cochrane Collaboration, 2009. Available from <http://www.cochrane-handbook.org>, 2009.*
14. Ryan R HS, Prictor M, McKenzie J;. Cochrane Consumers and Communication Review Group. Study Quality Guide.  
[http://ccrg.cochrane.org/sites/ccrg.cochrane.org/files/uploads/StudyQualityGuide\\_May2011.pdf](http://ccrg.cochrane.org/sites/ccrg.cochrane.org/files/uploads/StudyQualityGuide_May2011.pdf) (accessed 01 February 2013) 2011
15. Thomson. <http://www.endnote.com>. ISI Research-Soft Endnote 90
16. Borenstein M. *Introduction to meta-analysis*. Chichester, U.K.: John Wiley & Sons, 2009.
17. Higgins JP, Thompson SG. Quantifying heterogeneity in a meta-analysis. *Stat Med* 2002;**21**(11):1539-58
18. Horvath T, Azman H, Kennedy GE, et al. Mobile phone text messaging for promoting adherence to antiretroviral therapy in patients with HIV infection. *Cochrane Database*

- 1  
2  
3 Syst Rev 2012;**3**:CD009756 doi: 10.1002/14651858.CD009756[published Online First:  
4 Epub Date]].
- 5 19. Thirumurthy H, Lester RT. M-health for health behaviour change in resource-limited  
6 settings: applications to HIV care and beyond. Bulletin of the World Health Organization  
7 2012;**90**(5):390-2 doi: 10.2471/BLT.11.099317[published Online First: Epub Date]].
- 8 20. Balshem H, Helfand M, Schunemann HJ, et al. GRADE guidelines: 3. Rating the quality of  
9 evidence. J Clin Epidemiol 2011;**64**(4):401-6 doi:  
10 10.1016/j.jclinepi.2010.07.015[published Online First: Epub Date]].
- 11 21. Landis JR, Koch GG. The measurement of observer agreement for categorical data. Biometrics  
12 1977;**33**(1):159-74
- 13 22. Emanuel EJ, Wendler D, Killen J, et al. What makes clinical research in developing countries  
14 ethical? The benchmarks of ethical research. The Journal of infectious diseases  
15 2004;**189**(5):930-7 doi: 10.1086/381709[published Online First: Epub Date]].
- 16 23. Karanja S, Mbuagbaw L, Ritvo P, et al. A workshop report on HIV mHealth synergy and  
17 strategy meeting to review emerging evidence-based mHealth interventions and develop  
18 a framework for scale-up of these interventions. The Pan African medical journal  
19 2011;**10**:37  
20  
21  
22  
23  
24  
25  
26  
27  
28  
29  
30  
31  
32  
33  
34  
35  
36  
37  
38  
39  
40  
41  
42  
43  
44  
45  
46  
47  
48  
49  
50  
51  
52  
53  
54  
55  
56  
57  
58  
59  
60



Table 1. PubMed search strategy, modified as needed for use in other databases

| Search | PubMed                                                                                                 |
|--------|--------------------------------------------------------------------------------------------------------|
| #1     | (immunization[Mesh]) OR ( immunis* OR immuniz* OR vaccin*)                                             |
| #2     | (adolescents OR children OR teenagers)                                                                 |
| #3     | "SMS" OR cellphone OR "mobile phone" OR "text messaging" OR "short message service" OR "text reminder" |
| #4     | #1 AND #2                                                                                              |
| #5     | #3 AND #4                                                                                              |

MeSH, medical subject heading

1  
2  
3  
4  
5  
6  
7 Mobile phone text messaging for improving the uptake of vaccinations: a systematic  
8 review protocol  
9

10  
11 Robyn Kalan

12 Department of Medicine, Faculty of Health Sciences, University of Cape Town, Anzio  
13 Road, Observatory 7925, Cape Town, South Africa  
14  
15 Robyn.kalan@gmail.com  
16

17  
18  
19 Charles S. Wiysonge

20 Department of Interdisciplinary Health Sciences, Faculty of Medicine and Health  
21 Sciences, Stellenbosch University, Tygerberg 7505, Cape Town, South Africa  
22  
23 charlesw@sun.ac.za  
24

25  
26 Tshepiso Ramafuthole

27 Faculty of Health Sciences, University of Cape Town, Anzio Road, Observatory 7925,  
28 Cape Town, South Africa  
29  
30 rmftsh001@myuct.ac.za  
31

32  
33 Kurt Allie

34 Faculty of Health Sciences, University of Cape Town, Anzio Road, Observatory 7925,  
35 Cape Town, South Africa  
36  
37 allkur003@myuct.ac.za  
38

39  
40 Fatima Ebrahim

41 Faculty of Health Sciences, University of Cape Town, Anzio Road, Observatory 7925,  
42 Cape Town, South Africa  
43  
44 ebrfat010@myuct.ac.za  
45

46  
47  
48 Mark Emmanuel Engel

49 Department of Medicine, Faculty of Health Sciences, University of Cape Town, Anzio  
50 Road, Observatory 7925, Cape Town, South Africa  
51  
52 mark.engel@uct.ac.za  
53

1  
2  
3  
4  
5  
6  
7  
8 **\*Corresponding author**

9 Dr Mark Emmanuel Engel

10 Department of Medicine, University of Cape Town

11 J46-43, Old Main Building, Groote Schuur Hospital

12 Anzio Road, Observatory 7925, South Africa

13 Phone: +27 21 404 7676

14 Fax: 27 21 448 6815

15 E: mark.engel@uct.ac.za  
16  
17  
18  
19  
20  
21  
22  
23  
24  
25

26 **Keywords:** Vaccine coverage, vaccination, Mobile text messaging, short messaging  
27 service, SMS  
28  
29  
30  
31  
32  
33  
34  
35

36 **Word Count:** 2424  
37  
38  
39  
40  
41  
42  
43  
44  
45  
46  
47  
48  
49  
50  
51  
52  
53  
54  
55  
56  
57  
58  
59  
60

## ABSTRACT

**Background/Introduction:** Low vaccine coverage is a major public health concern, the consequences of which contribute to around 1.5 million child deaths from vaccine-preventable diseases. Thus, innovative strategies to rapidly increase coverage and recall rates for vaccinations are urgently required. Mobile text messaging (or short messaging service, SMS) has the potential to help increase vaccination coverage and therefore we propose to conduct a review of the current best evidence for the use of SMS as an intervention to promote vaccination coverage.

**Methods and Analysis/Design:** This article describes the protocol for a systematic review of the effectiveness of SMS in improving the uptake of vaccination. Primary and secondary outcomes of interest are pre-specified. We will preferably include randomized controlled trials (RCTs). However, non-randomized studies (NRS) will be considered if there is an inadequate number of RCTs. We will search several bibliographic databases (for example PubMed, EMBASE, CINAHL, CENTRAL, Science Citation Index, Africa-Wide Information, and WHOLIS electronic databases and search sources for grey literature. Following data extraction and assessment of risk of bias, we will meta-analyze studies and conduct sub-group analyses, according to intervention subtypes. We will assess clinical heterogeneity and statistical heterogeneity. For outcomes without quantitative data, a descriptive analysis will be used. [This review protocol is registered in the PROSPERO International Prospective Register of systematic reviews, registration number 2014:CRD42014007531](#)

1  
2  
3  
4  
5  
6  
7  
8  
9  
10  
11  
12  
13  
14  
15  
16  
17  
18  
19  
20  
21  
22  
23  
24  
25  
26  
27  
28  
29  
30  
31  
32  
33  
34  
35  
36  
37  
38  
39  
40  
41  
42  
43  
44  
45  
46  
47  
48  
49  
50  
51  
52  
53  
54  
55  
56  
57  
58  
59  
60

**Discussion**Ethics and dissemination: Ethics is not required for this study, given that this is a protocol for a systematic review, which uses published data. This findings of this study will be disseminated through peer-reviewed publications and conference presentations. We anticipate that the Our results could ~~can~~ be used by researchers and policy-makers to help inform them of the efficacy of mobile phone text messaging interventions to promote increased vaccination coverage.

### Strengths and limitations of this study

- To our knowledge, this is the first systematic review protocol that will attempt to assess the impact of mobile text messaging on promoting the uptake of vaccination amongst adults, adolescents and parents or caregivers of children.
- This study will help inform clinical practice and future studies on the effectiveness of media platforms.
- Non-randomised studies of low-quality evidence may be this study's limitation. We will, however, conduct appropriate analyses to assess the overall robustness of the results.

## **BackgroundIntroduction**

Vaccinations, when given at the most sensitive developmental years of childhood, help to promote comprehensive and capable immunity, enabling children to fight off certain diseases [1 2]. In addition, vaccinations are widely regarded as one of the most cost-effective public health interventions that help to reduce global child morbidity and mortality [3 4]. Low coverage of vaccinations is a major public health concern. In Africa alone, more than seven million children did not receive the full spectrum of vaccinations recommended before reaching one year of age in 2009 [5]. It is also estimated that 1.5 million children died globally from vaccine-preventable diseases where World Health Organization (WHO) pre-qualified vaccines were available [6].

The Global Vaccine Action plan (GVAP) is the most recently launched global effort by the WHO to help increase vaccination coverage. The GVAP has set a target that by 2020 vaccination coverage for populations should reach 90% national vaccination coverage and at least 80% at district levels utilizing national vaccination programmes [7]. It is guided by six principles: country ownership, shared responsibility and partnership, equity, integration, sustainability, and innovation [8]

A variety of factors impact achieving low coverage rates; challenges such as immunisation awareness, demand for immunisation, level of trust in the health system, adequate human resources, access, timeliness of vaccinations, service delivery, poor infrastructure and vaccination monitoring [4]. Vaccination coverage seems to be lower in low-income households, where limited access to health education, contributes to poor

1  
2  
3  
4  
5  
6  
7  
8  
9  
10  
11  
12  
13  
14  
15  
16  
17  
18  
19  
20  
21  
22  
23  
24  
25  
26  
27  
28  
29  
30  
31  
32  
33  
34  
35  
36  
37  
38  
39  
40  
41  
42  
43  
44  
45  
46  
47  
48  
49  
50  
51  
52  
53  
54  
55  
56  
57  
58  
59  
60

health-seeking behaviour along with an inability to improve general wellbeing [1 2 9]. Uneducated parents therefore are less likely to understand the importance of vaccinating to prevent potentially harmful diseases. In light of these obstacles to vaccination coverage, the strategy to improve vaccination coverage needs to be innovative as alluded to in the GVAP, well thought out and able to penetrate low income households effectively.

Globally, mobile phone use is rapidly increasing, with an estimated six billion mobile phone users worldwide at the end of 2011 [10]. In particular, mobile phone text messaging has gained popularity among people living in low- and middle-income countries and may be the key to penetrating hard to reach areas in the developing world. Text messaging has proven to be a cost effective method of relaying health information and reminders than the more traditional methods such as face-to-face, phone calls, pamphlets, mail and email [5]. As immunisation usually requires multiple consecutive monthly visits after the first vaccine dose in order to complete the schedule, short messaging service (SMS) can be used as reminder for an upcoming visit and recall when a visit has been missed [1]. In addition, an SMS intervention, also known as mobile phone text messaging, can be delivered alone or bundled with other interventions [11]. Diseases that have used mobile technology successfully include HIV where a 90% adherence was observed among text message recipients compared with a 40% adherence in the control group [12]. We therefore propose to conduct a systematic review of the current best evidence for the use of mobile phone text messaging to improve vaccination coverage.

## Methods

This review protocol has been published in the PROSPERO International Prospective Register of systematic reviews (<http://www.crd.york.ac.uk/PROSPERO>), registration number 2014:CRD42014007531.

### Criteria for considering studies for this review

#### *Type of studies*

We will include randomized controlled trials (RCTs), interrupted time series and controlled before and after studies (CBA).

#### *Types of participants*

Participants will be caregivers of infants or children, adolescents and adults including pregnant women drawn from any setting, community-based or otherwise.

~~Participants will be adults, children or caregivers of those receiving vaccinations, in community-based settings.~~

#### *Types of interventions*

We will include interventions in which mobile phone text messages serve as a reminder to be vaccinated, as educational information or, as information regarding vaccine availability at the clinic in an attempt ~~are used~~ to promote uptake of vaccinations. Vaccinations could include routine infant immunisations, those against human papilloma virus, influenza, meningococcal (MCV4) or tetanus/diphtheria/acellular pertussis (Tdap). ~~The text messaging needs to be delivered to a person needing a vaccination, or in the case of an infant or~~



1  
2  
3  
4  
5  
6  
7  
8  
9  
10  
11  
12  
13  
14  
15  
16  
17  
18  
19  
20  
21  
22  
23  
24  
25  
26  
27  
28  
29  
30  
31  
32  
33  
34  
35  
36  
37  
38  
39  
40  
41  
42  
43  
44  
45  
46  
47  
48  
49  
50  
51  
52  
53  
54  
55  
56  
57  
58  
59  
60

~~child, to a caregiver.~~ Eligible studies will be those that compared SMS to no intervention, or to other interventions for increasing vaccination coverage. If we find less than ten studies that include only SMS as the intervention, we will include studies in which mobile phone voice speaking or voice messaging are interventions; studies in which the use of a beeper or pager is the intervention; studies in which the use of multimedia messaging service is the intervention; and studies in which text messages are bundled with other interventions. In such circumstances, we will stratify the analysis by type of intervention.

#### ***Types of outcome measures***

Results must include quantitative data for outcomes measured.

#### ***Primary outcomes:***

The primary outcome is vaccination coverage, irrespective of disease. We will use the definition of vaccine coverage as stipulated by the respective authors.

#### ***Secondary outcomes:***

Secondary outcomes are the recall rate in persons who had previously missed their vaccinations. scheduled appointments for vaccination or completeness of vaccination records.

#### **Search methods for identification of studies**

A comprehensive and exhaustive search of databases and conference proceedings will be performed by RK with the help of the University of Cape Town librarian, to identify all relevant studies available by ~~30 June 2013~~30 June 2014, regardless of language or

1  
2  
3  
4  
5  
6  
7 publication status. We will search both peer-reviewed journal articles and grey  
8 literature (unpublished, internal or non-reviewed papers and reports).  
9

### 10 11 12 **Database**

13  
14  
15 We will search the following electronic databases: PubMed; EMBASE; Cochrane Central  
16 Register of Controlled Trials (CENTRAL); ISI Web of Science (Science Citation Index);  
17 Africa-Wide Information, Cumulative Index of Nursing and Allied Health (CINAHL), and  
18 WHO library databases (WHOLIS). We will use both text words and medical subject  
19 heading (MeSH) terms; for example vaccination\*, immunization\*, immunisation\*,  
20 "Immunization"(MeSH), "Vaccination"(MeSH), "Immunization, Secondary"(MeSH) OR  
21 "Immunization Programs"(MeSH), "Immunization Schedule"(MeSH), "Mass  
22 Vaccination"(MeSH), mobile phone, text messaging, text\*, SMS, reminder\*, recall,  
23 telemedicine, mHealth, and eHealth. These terms will be used in varying combinations.  
24  
25 The literature search strategy will be adapted to suit each database. Table 1 shows the  
26 main search strategy we will use.  
27  
28  
29  
30  
31  
32  
33  
34  
35  
36  
37

### 38 **Conference proceedings**

39  
40 We will search the following conference proceedings for relevant abstracts: Vaccine and  
41 International Society for Vaccines Congress, International African Vaccinology Conference,  
42 Annual Vaccines Congress, Annual Conference on Vaccine Research, World Congress on  
43 Pediatric Infectious Diseases, International Pediatric Association Conference, National  
44 Immunization Conference, and the Annual Infectious Diseases in Children Symposium.  
45  
46  
47  
48  
49  
50  
51  
52  
53  
54  
55  
56  
57  
58  
59  
60

### ***Searching other sources***

For ongoing studies, we will search the WHO International Clinical trials Registry Platform, Clinicaltrials.gov, Pan African Clinical Trials Registry (PACTR), and contact individual researchers working in the field as well as the following organizations: WHO, Global Alliance for Vaccines and Immunisation, Centers for Disease Control and Prevention, and mHealth Alliance. We will also search the website of mHealth Alliance and mHealth in the Low Resource Settings resources database for eligible studies.

### ***Reference lists***

We will obtain reference lists of relevant studies identified and the full-text articles reviewed for inclusion in the review will be checked for additional information.

### ***Data collection and analysis***

The methods for data collection and analysis will be based on the Cochrane Handbook of Systematic Reviews for Interventions [13].

### ***Selection of studies for inclusion***

We will construct a screening guide to ensure that the inclusion criteria are adhered to and consistently applied by all review authors. Two review authors (RK and ME), working independently, will screen the titles and abstracts of all studies identified through the literature searches for eligibility. RK will obtain the full text of studies deemed potentially eligible. The two authors (RK and ME) will independently assess the full text of each article for eligibility, and compare their results and resolve

1  
2  
3  
4  
5  
6  
7 discrepancies by discussion and consensus, consulting a third author (CW) to resolve  
8  
9 any persistent disagreements. For all studies excluded by the assessors we will describe  
10  
11 the reasons for exclusion.

### ~~Data extraction and management~~

~~References will be managed using Thomson ISI Research Soft Endnote 9.0 [14]. Two  
17  
18 authors will independently extract descriptive and outcome data for each included  
19  
20 article using a standardized data collection form, resolving any discrepancies by  
21  
22 discussion and consensus; failing which, a third author (CW) will arbitrate. RK will  
23  
24 enter the final data into the Cochrane Collaboration Review Manager Version 5.1  
25  
26 statistical software (<http://ims.cochrane.org/RevMan>). CW will crosscheck the data  
27  
28 entered to ensure that there are no data entry errors.~~

### *Assessment of risk of bias in included studies*

32  
33 Two authors will independently assess the risk of bias in the included studies. Separate  
34  
35 criteria will be used to assess RCTs and non-randomized studies. The criteria used to  
36  
37 assess the risk of bias of in RCTs will be random sequence generation; allocation  
38  
39 concealment; blinding of participants, study personnel; blinding of outcome assessors;  
40  
41 incomplete outcome data; selective outcome reporting; other sources of bias, and  
42  
43 overall risk of bias, in accordance with the methods used by the Cochrane Collaboration  
44  
45 [13] as well as the Cochrane Consumers and Communication Review Group[15]. The  
46  
47 criteria used for risk of bias assessment for non-randomized studies will include  
48  
49 selection bias (with regard to comparability of groups, confounding and adjustment);  
50  
51 performance bias (in terms of the fidelity of the interventions, and quality of the  
52  
53 information regarding who received which interventions, including blinding of study  
54  
55  
56  
57  
58  
59  
60

1  
2  
3  
4  
5  
6  
7 subjects and healthcare providers); detection bias (regarding unbiased and correct  
8 assessment of outcomes, including blinding of assessors); attrition bias (with regard to  
9 completeness of sample, follow-up and data); and reporting bias (with regard to  
10 publication biases and selective reporting of results) [13]. Studies will be scored as  
11 having low, high or unclear risk of bias. The two authors will resolve disagreements in  
12 the assessment of risk of bias by discussion and consensus, consulting a third author to  
13 resolve any persistent disagreements.  
14  
15  
16  
17  
18  
19

### *Data extraction and management*

20  
21  
22 References will be managed using Thomson ISI Research-Soft Endnote 9.0 [14]. Two  
23 authors will independently extract descriptive and outcome data for each included  
24 article using a standardized data collection form, resolving any discrepancies by  
25 discussion and consensus; failing which, a third author (CW) will arbitrate. RK will  
26 enter the final data into the Cochrane Collaboration Review Manager Version 5.1  
27 statistical software (<http://ims.cochrane.org/RevMan>). CW will crosscheck the data  
28 entered to ensure that there are no data entry errors.  
29  
30  
31  
32  
33  
34  
35  
36  
37  
38  
39  
40

### *Data synthesis including assessment of heterogeneity*

#### *Measures of treatment effect*

41  
42  
43  
44  
45  
46 Data analysis will be conducted using the Cochrane Collaboration Review Manager  
47 Version 5.1 statistical software (<http://ims.cochrane.org/RevMan>). The outcomes of  
48 interest will be either dichotomous or continuous. We will calculate risk ratios and their  
49 corresponding 95% confidence intervals and P-values for dichotomous outcomes, and  
50  
51  
52  
53  
54  
55  
56  
57  
58  
59  
60

1  
2  
3  
4  
5  
6  
7 mean differences and standard deviations for continuous outcomes. Where outcomes are  
8 measured using different scales, we will report standardised mean differences (SMD) [16].

Formatted: Font: (Default) Times New Roman

### 12 ***Dealing with missing data***

13  
14  
15 In cases of missing or incomplete information presented in the included studies, we shall  
16 contact authors for further information.

### 20 ***Data synthesis, assessment/investigation of heterogeneity***

21  
22  
23 We will assess clinical heterogeneity by examining types of participants, interventions,  
24 and outcomes in each study. We will pool data only from studies judged to be clinically  
25 homogenous. Statistical heterogeneity in each meta-analysis will be assessed using the  
26 chi-square test and quantified using the I-squared statistic [17] . If studies are  
27 sufficiently homogenous (in terms of study populations, interventions, and outcomes),  
28 then we will pool the data across studies and estimate summary effect sizes using a  
29 fixed-effects model. Otherwise, we will use the random-effects model. Should  
30 heterogeneity remain significant, we will discuss the findings as a narrative summary.

31  
32  
33 We will perform subgroup analyses by intervention subtypes: long versus short  
34 messages; daily versus weekly messages; short weekly messages versus long weekly  
35 messages; short daily messages versus long daily messages; and two-way interactive  
36 communication versus one-way communication [12 18 19]. We will also stratify analysis  
37 by study design (randomized controlled separate from non-randomized studies) and  
38 intervention type (multiple interventions involving text messaging separate from text  
39 messaging alone). We will also conduct a subgroup comparison of self-reported vaccination  
40  
41  
42  
43  
44  
45  
46  
47  
48  
49  
50  
51  
52  
53  
54  
55  
56  
57  
58  
59  
60

1  
2  
3  
4  
5  
6  
7 completion versus verified clinic records as well as according to age categories and country  
8 setting.  
9

10  
11  
12 Finally, we will use the grading of recommendations assessment, development, and  
13 evaluation (GRADE) approach [20] to assess the quality of evidence for the effectiveness  
14 of the SMS intervention. This method results in an assessment of the quality of the body  
15 of evidence as high, moderate, low, or very low. Evidence is considered of high quality if  
16 'further research is very unlikely to change our confidence in the estimate of effect'; and  
17 moderate quality if 'further research is likely to have an important impact on our  
18 confidence in the estimate of effect and may change the estimate'. Low quality evidence  
19 implies that 'further research is very likely to have an important impact on our  
20 confidence in the estimate of effect and is likely to change the estimate', and very low  
21 quality that 'we have very little confidence in the effect estimate'.  
22  
23  
24  
25  
26  
27  
28  
29  
30  
31  
32  
33  
34

### 35 ***Sensitivity analyses***

36  
37 Several sensitivity analyses will be performed: first to determine whether the study  
38 design (RCT versus nonrandomized study) could influence the results of the meta-  
39 analysis; second, to evaluate whether the model of the statistical method (random-  
40 effects vs fixed-effects model) could change the results, and third, to determine the  
41 impact of excluding studies with a high risk bias on the results, with emphasis on  
42 allocation concealment, blinded outcome assessment, and losses to follow-up (with a cut  
43 off of 25% loss to follow-up).  
44  
45  
46  
47  
48  
49  
50  
51  
52  
53  
54  
55  
56  
57  
58  
59  
60

### **Presenting and reporting of results this review**

Findings in our systematic review will be presented in several ways. Flow diagrams will be used to summarise the study selection process. Funnel plots will be used to assess publication bias if we identify 10 or more eligible studies. The kappa statistic [21] will be used to assess agreements between the full-text screening, data extraction and risk of bias assessment by the two authors (RK and ME). GRADE summary of tables of findings, risk of bias tables or graphs, and forest plots will also be used where appropriate. The reporting of outcomes without quantitative data will be descriptive. Lastly, we will provide a list of excluded studies with reasons for exclusion.

### **Ethics and dissemination**

Systematic reviews draw on publicly available data and do not directly involve human subjects, and therefore do not require formal ethical review [22]. The study protocol will be reviewed by supervisors with expertise in methodology (systematic review) and submitted to the University of Cape Town Departmental Research Committee for approval.

**Formatted:** Justified, Space Before: 6 pt, After: 10 pt, Don't add space between paragraphs of the same style, Line spacing: Double



## Discussion

### *Expected significance of the study*

The findings of this systematic review will have implications for policy, practice and research. We will discuss the relevance of our findings to childhood immunisation programmes in Africa in the decade of vaccines with emphasis on applicability, effects on equity, cost implications, and monitoring and evaluation. Our systematic review will provide evidence of whether policy-makers can adopt mobile phone text messaging alone or in combination with other interventions in efforts to improve uptake of vaccines in national immunisation programmes. It will also inform clinic or hospital managers of how best to use the intervention to improve vaccination coverage. The systematic review may also identify specific considerations that would need to be taken into account for future studies, such as study location, content and timing of messages, whether or not parents or caregivers replied to text messages, how text messages were sent (automated versus manual), indicators for immunisation programmes, variety of text messages sent (inclusion of jokes or lifestyle tips), duration of the study, whether or not participants were provided with the mobile handsets, and sample size [23].

### Abbreviations

WHO: World Health Organization; GVAP: Global Vaccine Action plan; SMS: Short messaging service; RCT: Randomized Controlled Trials; CBA: Controlled Before and After study; MeSH: medical subject heading;

Formatted: Space After: 10 pt, Line spacing: Multiple 1.15 li, Adjust space between Latin and Asian text, Adjust space between Asian text and numbers

Formatted: Justified, Space Before: 6 pt, Don't add space between paragraphs of the same style, Line spacing: Double, Don't adjust space between Latin and Asian text, Don't adjust space between Asian text and numbers

## Acknowledgements

The authors would like to acknowledge the critical input and support of the Evidence-Based Medicine Research Support Unit, Faculty of Health Sciences, University of Cape Town.

## Author's eContributionship statement

Robyn Kalan, BSc (Hons) Nursing is a research fellow. Tshepiso Ramafuthole, Kurt Allie and Fatima Ebrahim are MBChB students. Mark Engel, MPH, PhD and Charles Wiysonge, MD, PhD are senior researchers.

CW, TR, KA, and FE conceived of the review. All authors developed the design of the protocol and will be involved in data acquisition. RK undertook the drafting of the manuscript. RK and ME will analyze the data and participate in the interpretation of the results. All authors have given their approval for publication.

## Competing interests

The authors declare that they have no competing interests.

## Funding

We did not receive any dedicated funding for this manuscript.

## References

1. Garde M. Inequalities in child survival: Looking at wealth and other socio-economic disparities in developing countries.  
[http://www.savethechildren.org.uk/sites/default/files/docs/Final\\_draft\\_inequalities\\_of\\_child\\_survival\\_10\\_August\\_formatted\\_2\\_1.pdf](http://www.savethechildren.org.uk/sites/default/files/docs/Final_draft_inequalities_of_child_survival_10_August_formatted_2_1.pdf) [Accessed August 5th 2012] 2010
2. Multiple Authors. Vaccines & Preventable Diseases. National Center for Immunization and Respiratory Disease. <http://www.cdc.gov/vaccines/vpd-vac/default.htm> 2009
3. Bloom DE. The value of vaccination. *Advances in experimental medicine and biology* 2011;**697**:1-8 doi: 10.1007/978-1-4419-7185-2\_1 [published Online First: Epub Date]].
4. Machingaidze S, Wiysonge CS, Hussey GD. Strengthening the expanded programme on immunization in Africa: looking beyond 2015. *PLoS medicine* 2013;**10**(3):e1001405 doi: 10.1371/journal.pmed.1001405 [published Online First: Epub Date]].
5. Stockwell MS, Kharbanda EO, Martinez RA, et al. Text4Health: impact of text message reminder-recalls for pediatric and adolescent immunizations. *American journal of public health* 2012;**102**(2):e15-21 doi: 10.2105/AJPH.2011.300331 [published Online First: Epub Date]].
6. World Health Organisation and UNICEF: Global Immunization Data. World Health Organisation and UNICEF: Global Immunization Data.  
[[http://www.who.int/immunization\\_monitoring/Global\\_Immunization\\_Data.pdf](http://www.who.int/immunization_monitoring/Global_Immunization_Data.pdf)]  
Accessed 10 June 2013
7. WHO Global Vaccination Action Plan.  
[[http://www.who.int/immunization\\_monitoring/Global\\_Immunization\\_Data.pdf](http://www.who.int/immunization_monitoring/Global_Immunization_Data.pdf)]  
Accessed 10 June 2013
8. Decade of Vaccines (DoV) Collaboration: Draft global vaccine action plan.  
[<http://www.dovcollaboration.org/action-plan/>] Accessed 10 June 2013
9. Kaewkungwal J, Singhasivanon P, Khamsiriwatchara A, et al. Application of smart phone in "Better Border Healthcare Program": a module for mother and child care. *BMC medical informatics and decision making* 2010;**10**:69 doi: 10.1186/1472-6947-10-69 [published Online First: Epub Date]].
10. Roter DL, Hall JA, Merisca R, et al. Effectiveness of interventions to improve patient compliance: a meta-analysis. *Medical care* 1998;**36**(8):1138-61
11. Mohammed S, Siddiqi O, Ali O, et al. User engagement with and attitudes towards an interactive SMS reminder system for patients with tuberculosis. *J Telemed Telecare* 2012;**18**(7):404-8 doi: 10.1258/jtt.2012.120311 [published Online First: Epub Date]].

12. Pop-Eleches C, Thirumurthy H, Habyarimana JP, et al. Mobile phone technologies improve adherence to antiretroviral treatment in a resource-limited setting: a randomized controlled trial of text message reminders. *AIDS* 2011;**25**(6):825-34 doi: 10.1097/QAD.0b013e32834380c1[published Online First: Epub Date]].
13. Higgins JPT, Green S, (editors). *Cochrane Handbook for Systematic Reviews of Interventions. Version 5.0.2 [updated September 2009]. The Cochrane Collaboration, 2009. Available from <http://www.cochrane-handbook.org>, 2009.*
14. Thomson. <http://www.endnote.com>. ISI Research-Soft Endnote 90
15. Ryan R HS, Prictor M, McKenzie J. Cochrane Consumers and Communication Review Group. Study Quality Guide. [http://ccrgcochraneorg/sites/ccrgcochraneorg/files/uploads/StudyQualityGuide\\_May2011pdf](http://ccrgcochraneorg/sites/ccrgcochraneorg/files/uploads/StudyQualityGuide_May2011pdf) (accessed 01 February 2013) 2011
16. Borenstein M. *Introduction to meta-analysis*. Chichester, U.K.: John Wiley & Sons, 2009.
17. Higgins JP, Thompson SG. Quantifying heterogeneity in a meta-analysis. *Stat Med* 2002;**21**(11):1539-58
18. Horvath T, Azman H, Kennedy GE, et al. Mobile phone text messaging for promoting adherence to antiretroviral therapy in patients with HIV infection. *Cochrane Database Syst Rev* 2012;**3**:CD009756 doi: 10.1002/14651858.CD009756[published Online First: Epub Date]].
19. Thirumurthy H, Lester RT. M-health for health behaviour change in resource-limited settings: applications to HIV care and beyond. *Bulletin of the World Health Organization* 2012;**90**(5):390-2 doi: 10.2471/BLT.11.099317[published Online First: Epub Date]].
20. Balslem H, Helfand M, Schunemann HJ, et al. GRADE guidelines: 3. Rating the quality of evidence. *J Clin Epidemiol* 2011;**64**(4):401-6 doi: 10.1016/j.jclinepi.2010.07.015[published Online First: Epub Date]].
21. Landis JR, Koch GG. The measurement of observer agreement for categorical data. *Biometrics* 1977;**33**(1):159-74
22. Emanuel EJ, Wendler D, Killen J, et al. What makes clinical research in developing countries ethical? The benchmarks of ethical research. *The Journal of infectious diseases* 2004;**189**(5):930-7 doi: 10.1086/381709[published Online First: Epub Date]].
23. Karanja S, Mbuagbaw L, Ritvo P, et al. A workshop report on HIV mHealth synergy and strategy meeting to review emerging evidence-based mHealth interventions and develop a framework for scale-up of these interventions. *The Pan African medical journal* 2011;**10**:37

Table 1. PubMed search strategy, modified as needed for use in other databases

| Search | PubMed                                                                                                 |
|--------|--------------------------------------------------------------------------------------------------------|
| #1     | (immunization[Mesh]) OR ( (immunis* OR immuniz* OR vaccin*)                                            |
| #2     | (adolescents OR children OR teenagers)                                                                 |
| #3     | "SMS" OR cellphone OR "mobile phone" OR "text messaging" OR "short message service" OR "text reminder" |
| #4     | #1 AND #2                                                                                              |
| #5     | #3 AND #4                                                                                              |

MeSH, medical subject heading
